# Supplementary material for: Mood and transient cardiac dysfunction in everyday life
Source: Springer Nature journal article supplement (doi:10.1007/s10865-010-9280-x), 2010-07-16

## **Mood and transient cardiac dysfunction in everyday life**

**Mimi R Bhattacharyya and Andrew Steptoe**

### **Electronic Supplementary Material**

#### **Figure legends**

##### **Supplementary figure 1**

Individual mood ratings during periods of ST depression / ventricular tachycardia (upper panel) and control periods. Each individual is represented by a dashed line. The solid line represents the mean responses, as illustrated in Figure 1 of the article.

##### **Supplementary figure 2**

Individual heart rates during periods of ST depression / ventricular tachycardia (upper panel) and control periods. Each individual is represented by a dashed line. The solid line represents the mean responses, as illustrated in Figure 1 of the article.

Supplementary Figure 1

### ST depression / ventricular tachycardia period

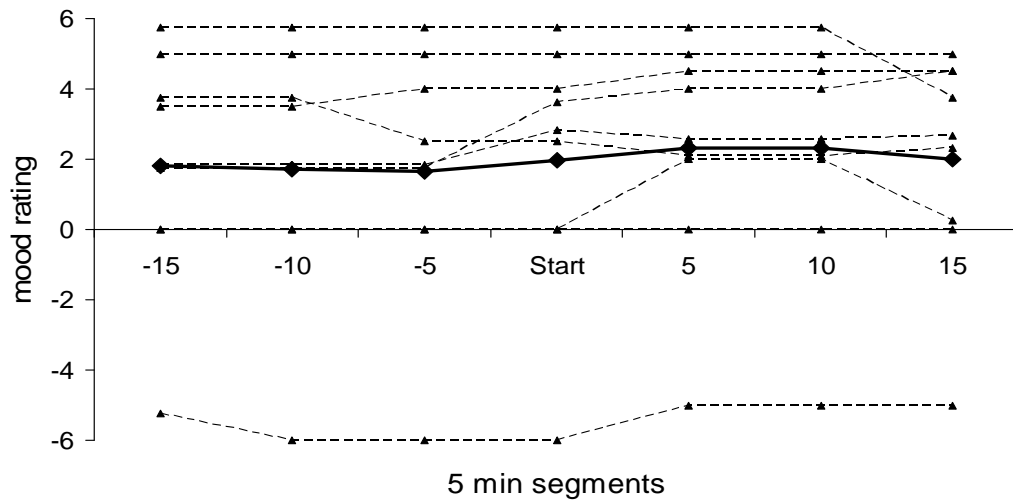

### Control period

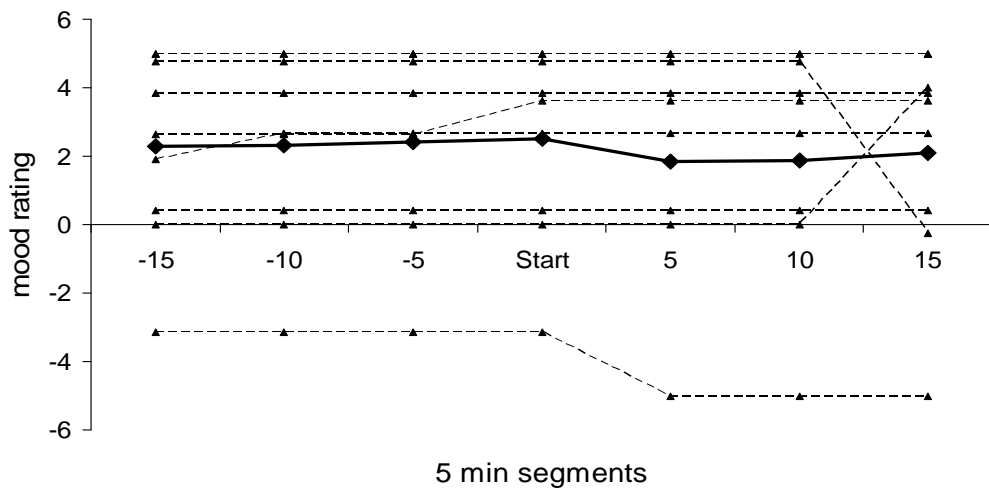

Supplementary Figure 2

### ST depression / ventricular tachycardia period

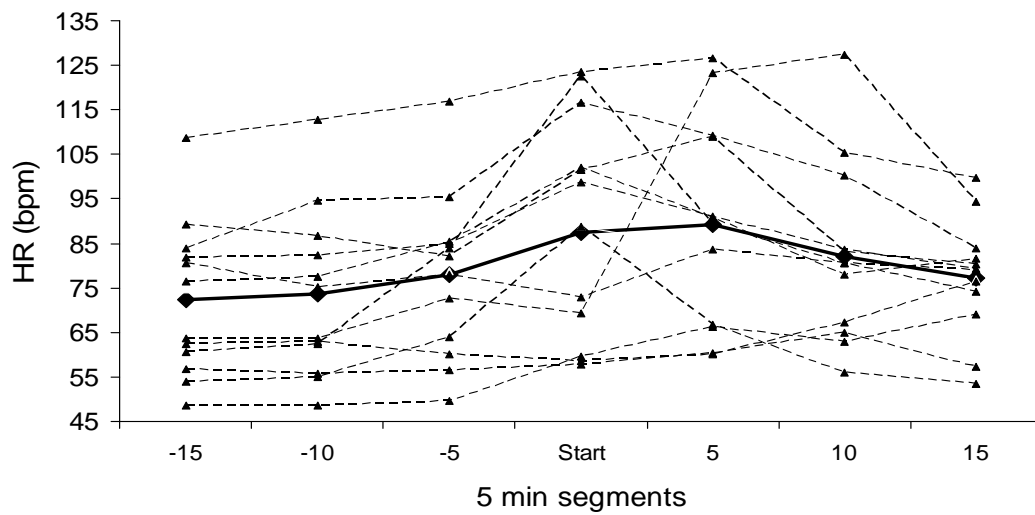

### Control period

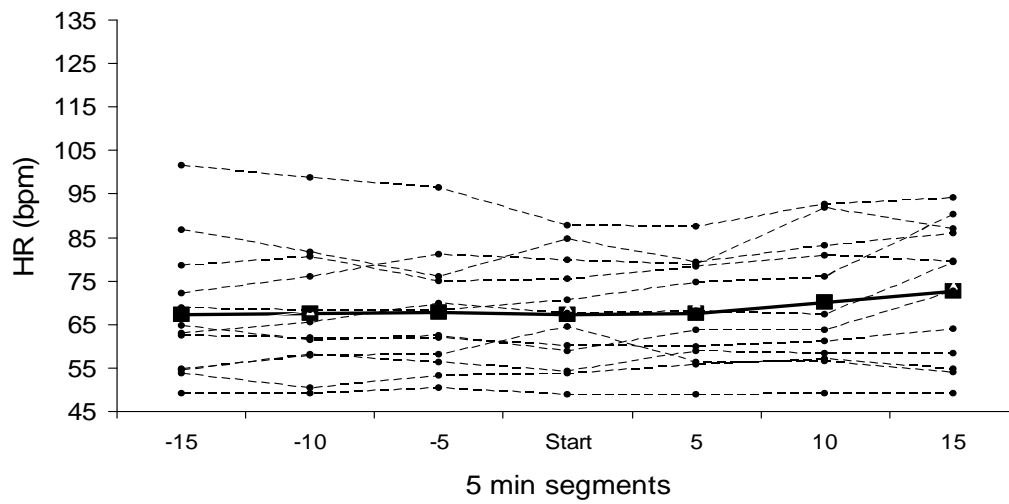

Supplement: MOESM1 [file 575270]
